# Supplementary material for: Attenuation of Lipopolysaccharide-Induced Inflammatory Responses through Inhibition of the NF-κB Pathway and the Increased NRF2 Level by a Flavonol-Enriched n-Butanol Fraction from Uvaria alba
Source: PubMed Central journal article supplement — ACS Omega. 2023 Jan 31;8(6):5377–92. doi: 10.1021/acsomega.2c06451 (PMC9933231; doi:10.1021/acsomega.2c06451), 2023-01-31
Supplement: ao2c06451_si_001.pdf [file ao2c06451_si_001.pdf]

## SUPPLEMENTARY MATERIAL FOR

# Attenuation of LPS-induced inflammatory responses through inhibition of NF- $\kappa$ B pathway and increased NRF2 level by a flavonol-enriched *n*-butanol fraction from *Uvaria alba*

Kin Israel R. Notarte,<sup>a,b</sup> Mark Tristan J. Quimque,<sup>a,c</sup> Imee T. Macaranas,<sup>d</sup> Abbas Khan,<sup>e</sup> Adriel M. Pastrana,<sup>d</sup> Oliver B. Villaflores,<sup>f</sup> Hans Christian P. Arturo,<sup>a</sup> Delfin Yñigo H. Pilapil IV,<sup>a</sup> Sophia Morgan M. Tan,<sup>a</sup> Dong-Qing Wei,<sup>e</sup> Arlette Wenzel-Storjohann,<sup>g</sup> Deniz Tasdemir,<sup>g,h</sup> Chia-Hung Yen,<sup>i</sup> Seon Yeong Ji,<sup>j</sup> Gi-Young Kim,<sup>k</sup> Yung Hyun Choi,<sup>j\*</sup> and Allan Patrick G. Macabeo<sup>a\*</sup>

<sup>a</sup>Laboratory of Organic Reactivity, Discovery & Synthesis (LORDS), Research Center for Natural & Applied Sciences, University of Santo Tomas, 1015 España, Manila, Philippines

<sup>b</sup>Department of Pathology, Johns Hopkins University School of Medicine, Baltimore, Maryland, USA

<sup>c</sup>Chemistry Department, College of Science and Mathematics, Mindanao State University - Iligan Institute of Technology, Tibanga, 9200 Iligan City, Philippines

<sup>d</sup>Faculty of Medicine & Surgery, University of Santo Tomas, 1015 España, Manila, Philippines

<sup>e</sup>Department of Bioinformatics and Biostatistics, State Key Laboratory of Microbial Metabolism, Shanghai Jiao Tong University, 800 Dongchuan Road Shanghai, Minhang District, China, 200240

<sup>f</sup>Laboratory of Phytochemistry, Research Center for Natural & Applied Sciences, University of Santo Tomas, 1015 España, Manila, Philippines

<sup>g</sup>GEOMAR Centre for Marine Biotechnology (GEOMAR-Biotech), Research Unit Marine Natural Product Chemistry, GEOMAR Helmholtz Centre for Ocean Research Kiel, 24106 Kiel, Germany

<sup>h</sup>Faculty of Mathematics and Natural Sciences, Kiel University, 24118 Kiel, Germany

<sup>i</sup>National Natural Product Libraries and High-Throughput Screening Core Facility, Kaohsiung Medical University, Kaohsiung 80708, Taiwan

<sup>j</sup>Department of Biochemistry, Dongeui University College of Korean Medicine, 52-57, Yangjeong-ro, Busanjin-gu Busan 47227, Republic of Korea

<sup>k</sup>Department of Marine Life Science, Jeju National University, 102 Jejudaehak-ro, Jeju-si, Jeju Special Self-Governing Province, 63243, Republic of Korea

\*corresponding authors: E-mail: [agmacabeo@ust.edu.ph](mailto:agmacabeo@ust.edu.ph) (APG Macabeo); [choiyh@deu.ac.kr](mailto:choiyh@deu.ac.kr) (YH Choi)

## LIST OF SUPPORTING INFORMATION

|                                                                                                                              | Page |
|------------------------------------------------------------------------------------------------------------------------------|------|
| <b>Figure S1.</b> LC chemical profile of <i>Uvaria alba</i> dichloromethane (DCM) fraction (negative-ion mode MS detection). | S3   |
| <b>Figure S2.</b> HR-ESIMS-QToF spectrum of compound <b>1</b> ( $t_R = 12.2$ min).                                           | S4   |
| <b>Figure S3.</b> HR-ESIMS-QToF spectrum of compound <b>3</b> ( $t_R = 12.7$ min).                                           | S5   |
| <b>Figure S4.</b> HR-ESIMS-QToF spectrum of compound <b>5</b> ( $t_R = 13.1$ min).                                           | S6   |
| <b>Figure S5.</b> HR-ESIMS-QToF spectrum of compound <b>6</b> ( $t_R = 11.5$ min).                                           | S7   |
| <b>Figure S6.</b> LC chemical profile of <i>Uvaria alba</i> DCM fraction (positive-ion mode MS detection).                   | S8   |
| <b>Figure S7.</b> HR-ESIMS-QToF spectrum of compound <b>2</b> ( $t_R = 12.7$ min).                                           | S9   |
| <b>Figure S8.</b> HR-ESIMS-QToF spectrum of compound <b>4</b> ( $t_R = 13.1$ min).                                           | S10  |
| <b>Figure S9.</b> HR-ESIMS-QToF spectrum of compound <b>7</b> ( $t_R = 11.6$ min).                                           | S11  |
| <b>Figure 10.</b> Secondary metabolites <b>1–7</b> detected in the n-butanol fraction of <i>U. alba</i> .                    | S12  |
| <b>Table S1.</b> Gene primer sequence.                                                                                       | S13  |
| <b>Table S2.</b> PCR reaction data.                                                                                          | S14  |
| <b>Table S3.</b> Data of RNA quantification.                                                                                 | S15  |
| <b>Table S4.</b> Secondary metabolites detected in the n-butanol fraction of <i>U. alba</i> (UaB).                           | S16  |
| <b>Table S5.</b> List of antibodies used in this study.                                                                      | S17  |
| <b>References</b>                                                                                                            | S18  |

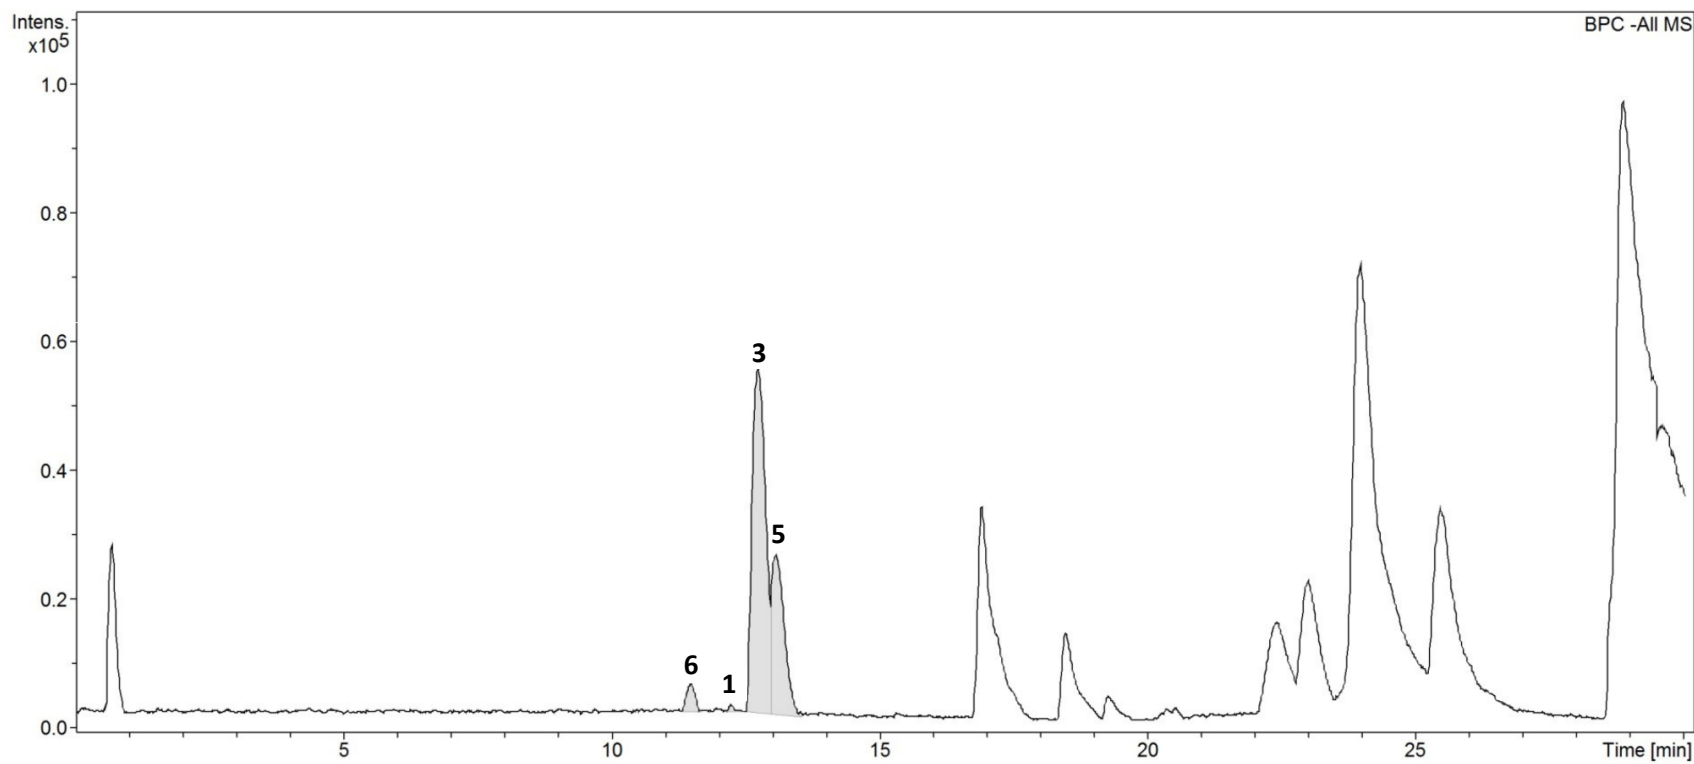

**Figure S1.** LC chemical profile of *Uvaria alba* dichloromethane (DCM) fraction (negative-ion mode MS detection).

## Compound Spectrum SmartFormula Report

Cmpd 1, 12.2 min

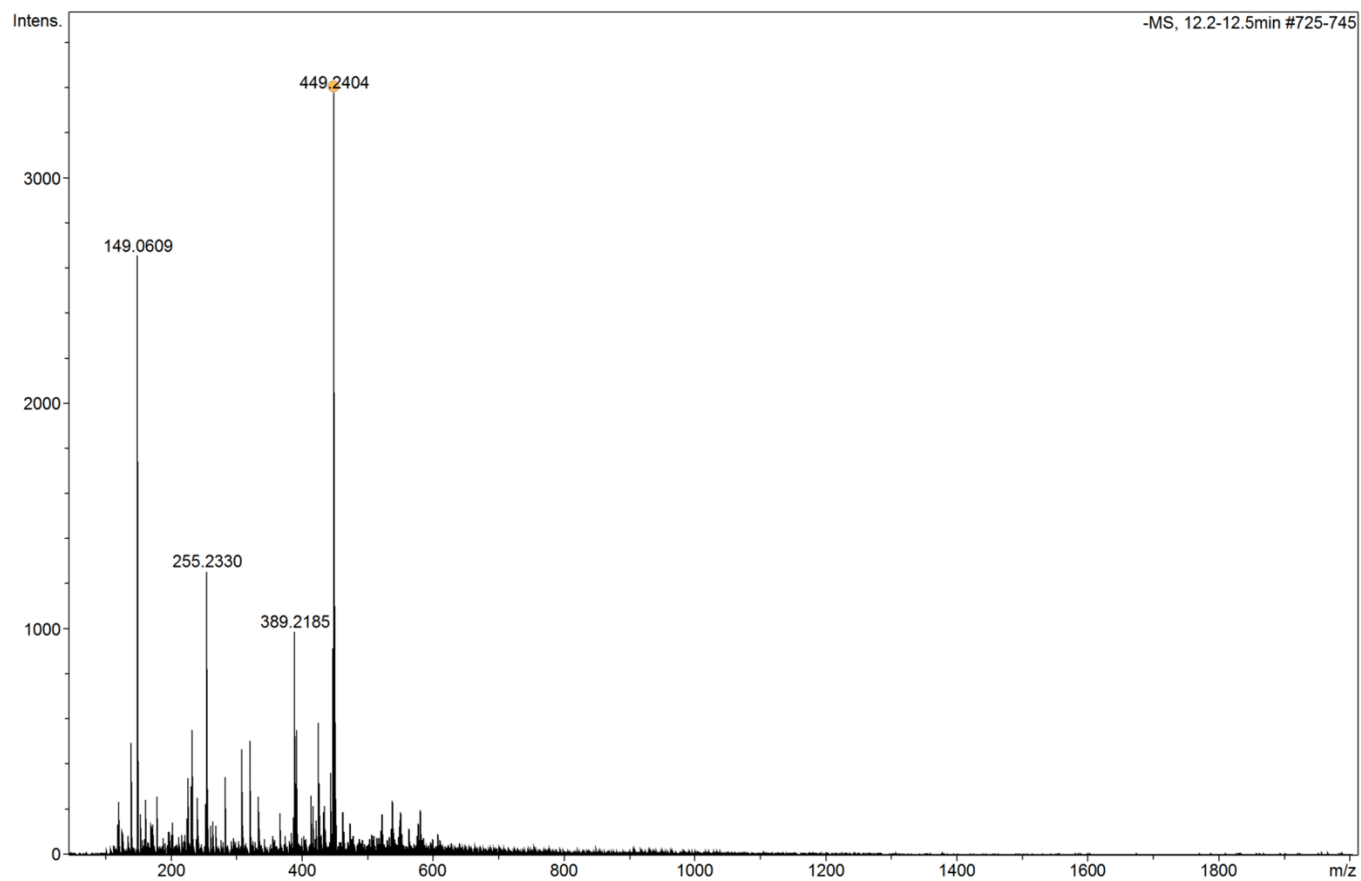

Bruker Compass DataAnalysis 4.3

printed: 19/2/2020 10:22:47 AM

by: Steven Yuan

Page 5 of 11

**Figure S2.** HR-ESIMS-QToF spectrum of compound **1** ( $t_R = 12.2$  min).

## Compound Spectrum SmartFormula Report

Cmpd 3, 12.7 min

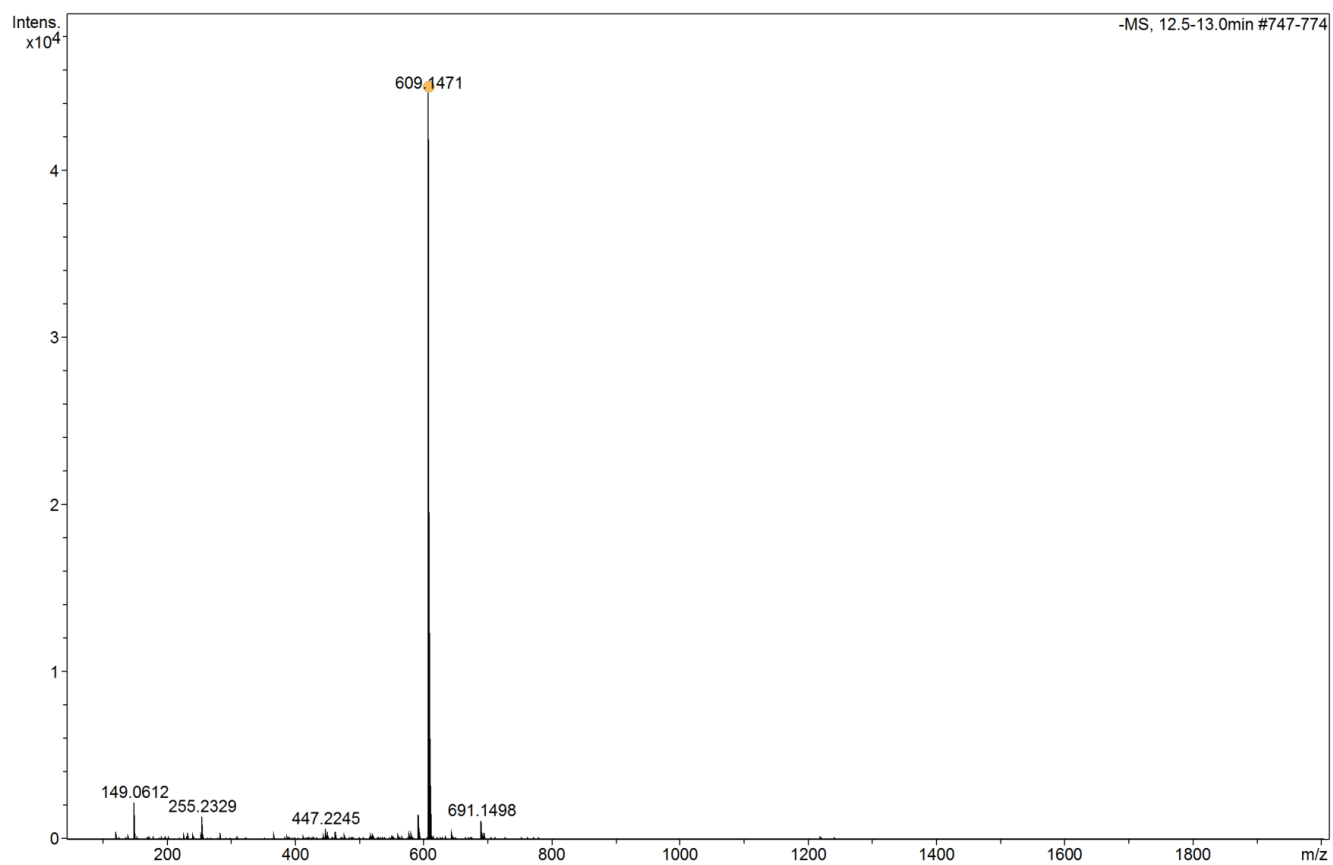

Bruker Compass DataAnalysis 4.3

printed: 19/2/2020 10:22:47 AM

by: Steven Yuan

Page 7 of 11

**Figure S3.** HR-ESIMS-QToF spectrum of compound **3** ( $t_R = 12.7$  min).

## Compound Spectrum SmartFormula Report

Cmpd 5, 13.1 min

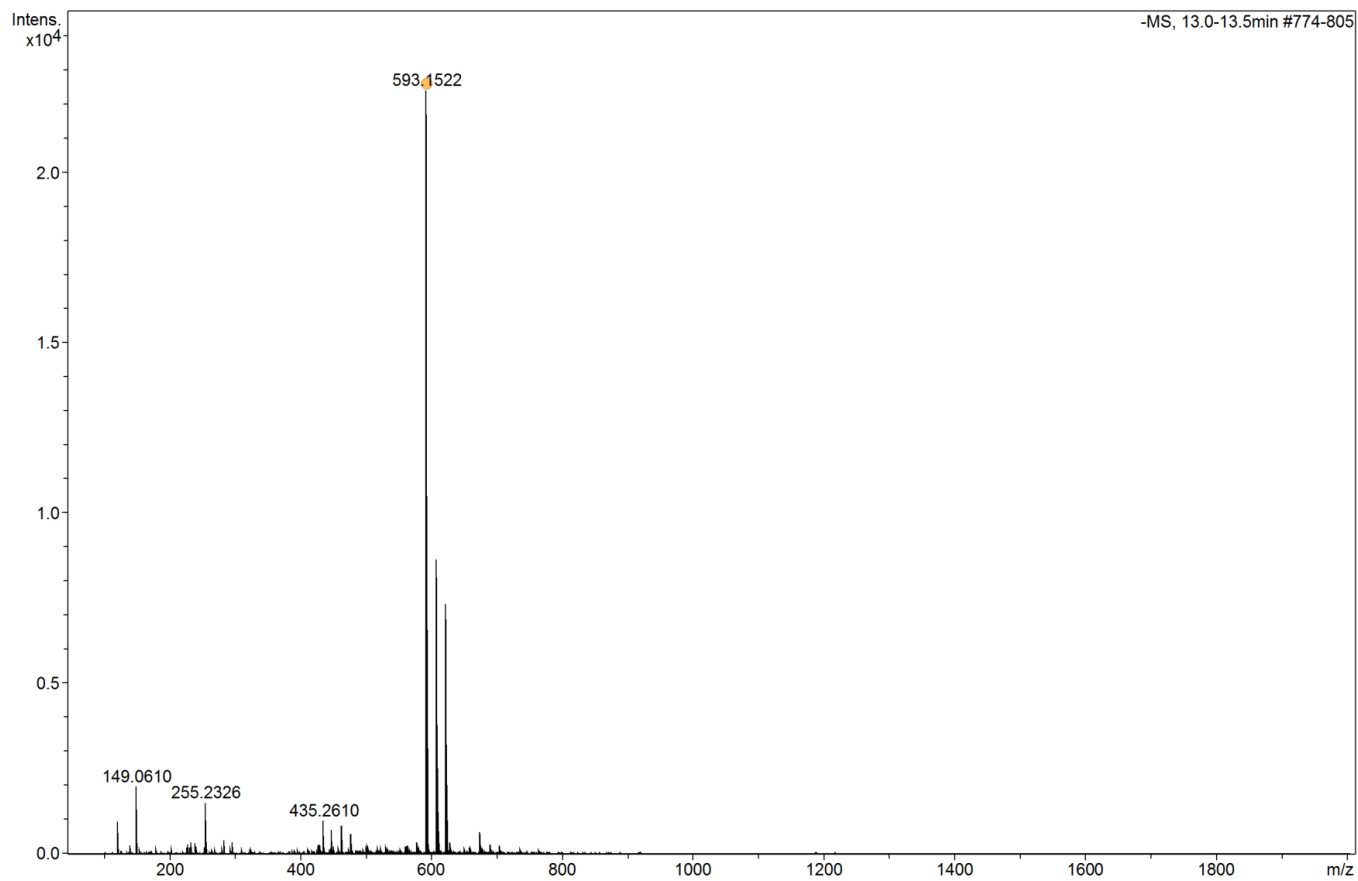

Bruker Compass DataAnalysis 4.3

printed: 19/2/2020 10:22:47 AM

by: Steven Yuan

Page 9 of 11

**Figure S4.** HR-ESIMS-QToF spectrum of compound **5** ( $t_R = 13.1$  min).

## Compound Spectrum SmartFormula Report

Cmpd 6, 11.5 min

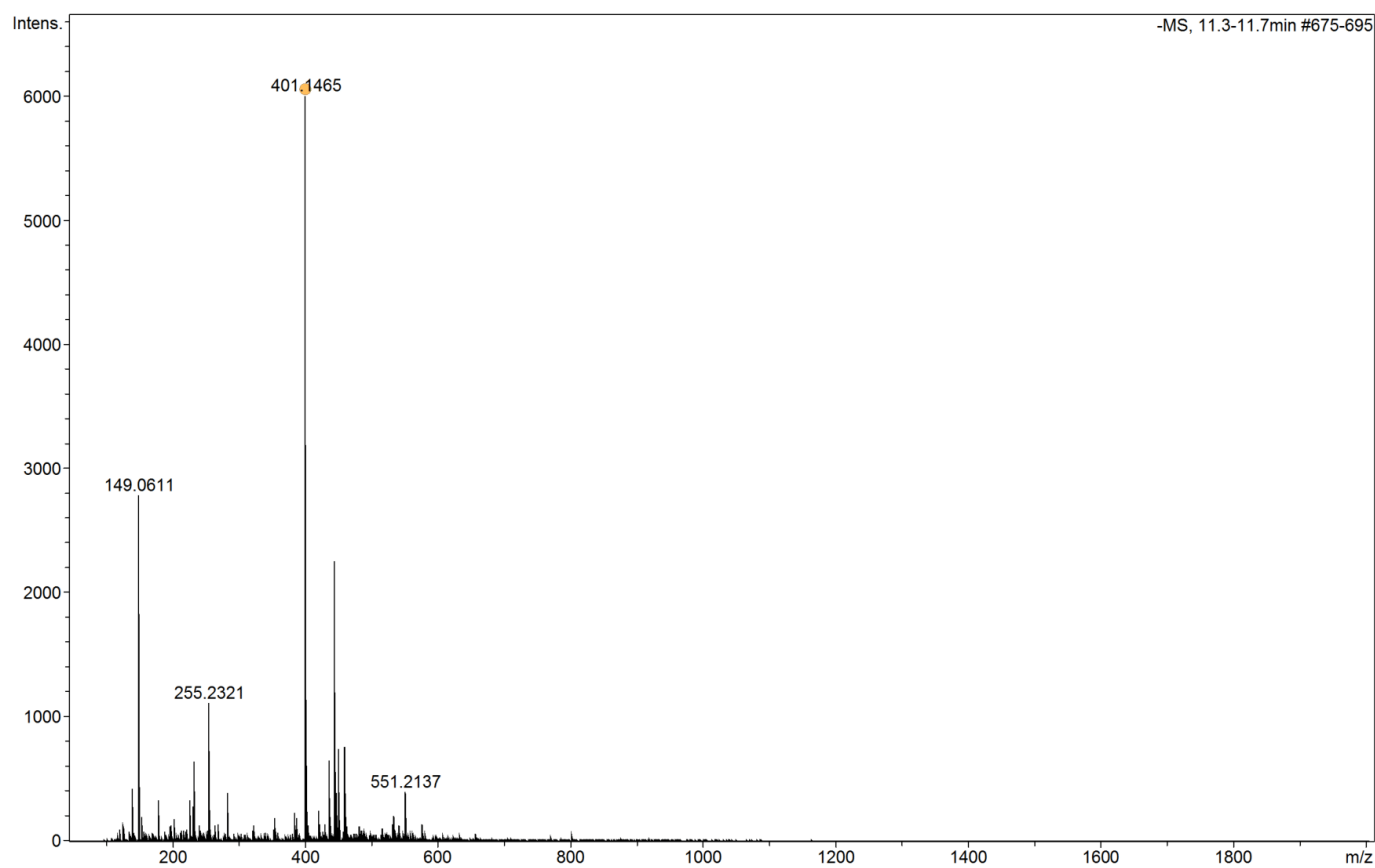

Bruker Compass DataAnalysis 4.3

printed: 19/2/2020 10:22:47 AM

by: Steven Yuan

Page 3 of 11

**Figure S5.** HR-ESIMS-QToF spectrum of compound **6** ( $t_R = 11.5$  min).

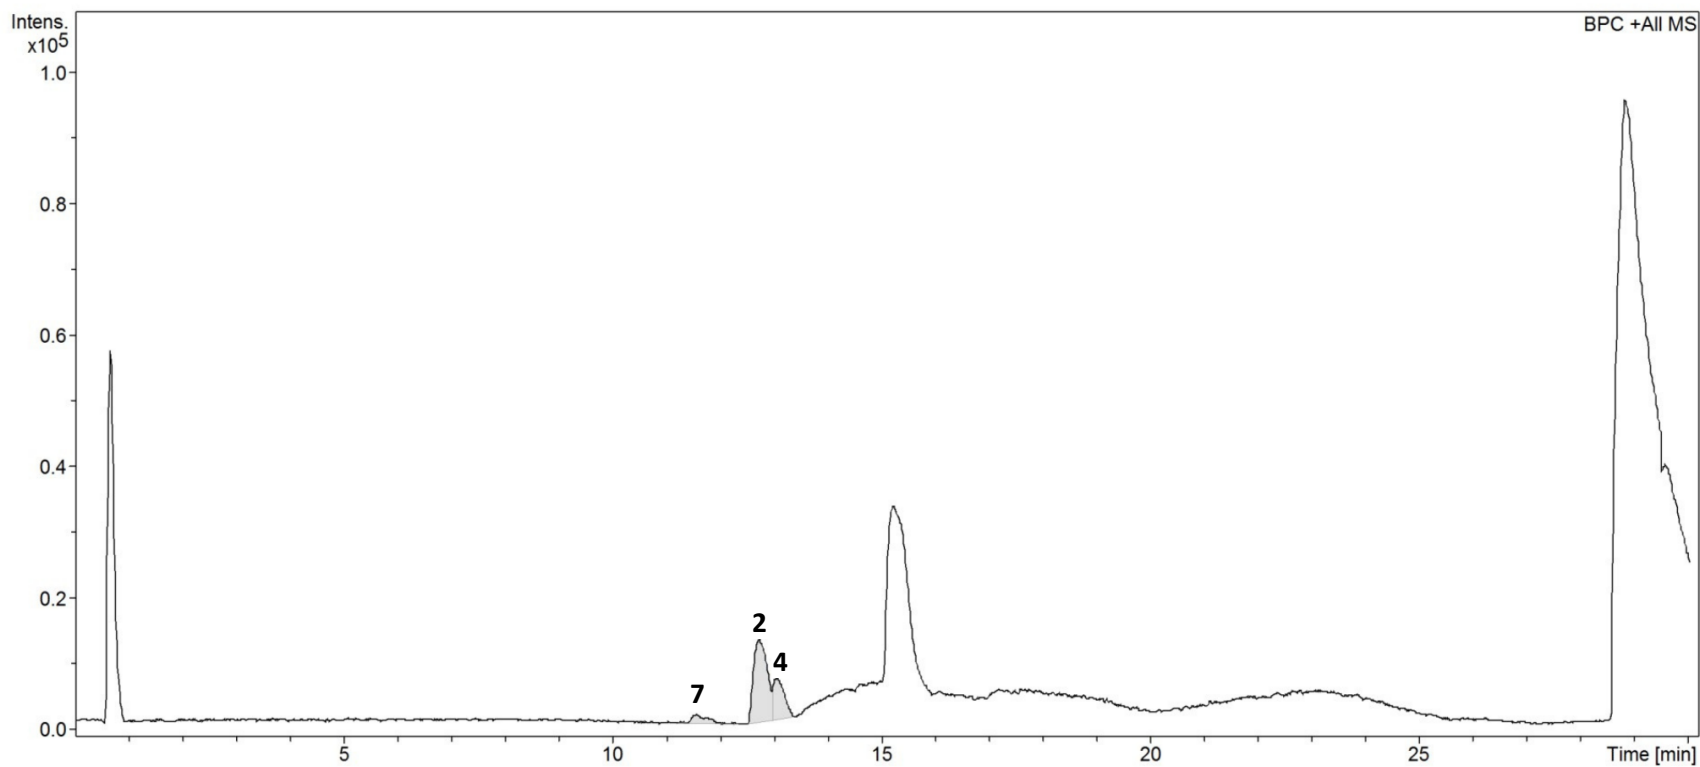

**Figure S6.** LC chemical profile of *Uvaria alba* DCM fraction (positive-ion mode MS detection).



## Compound Spectrum SmartFormula Report

Cmpd 2, 12.7 min

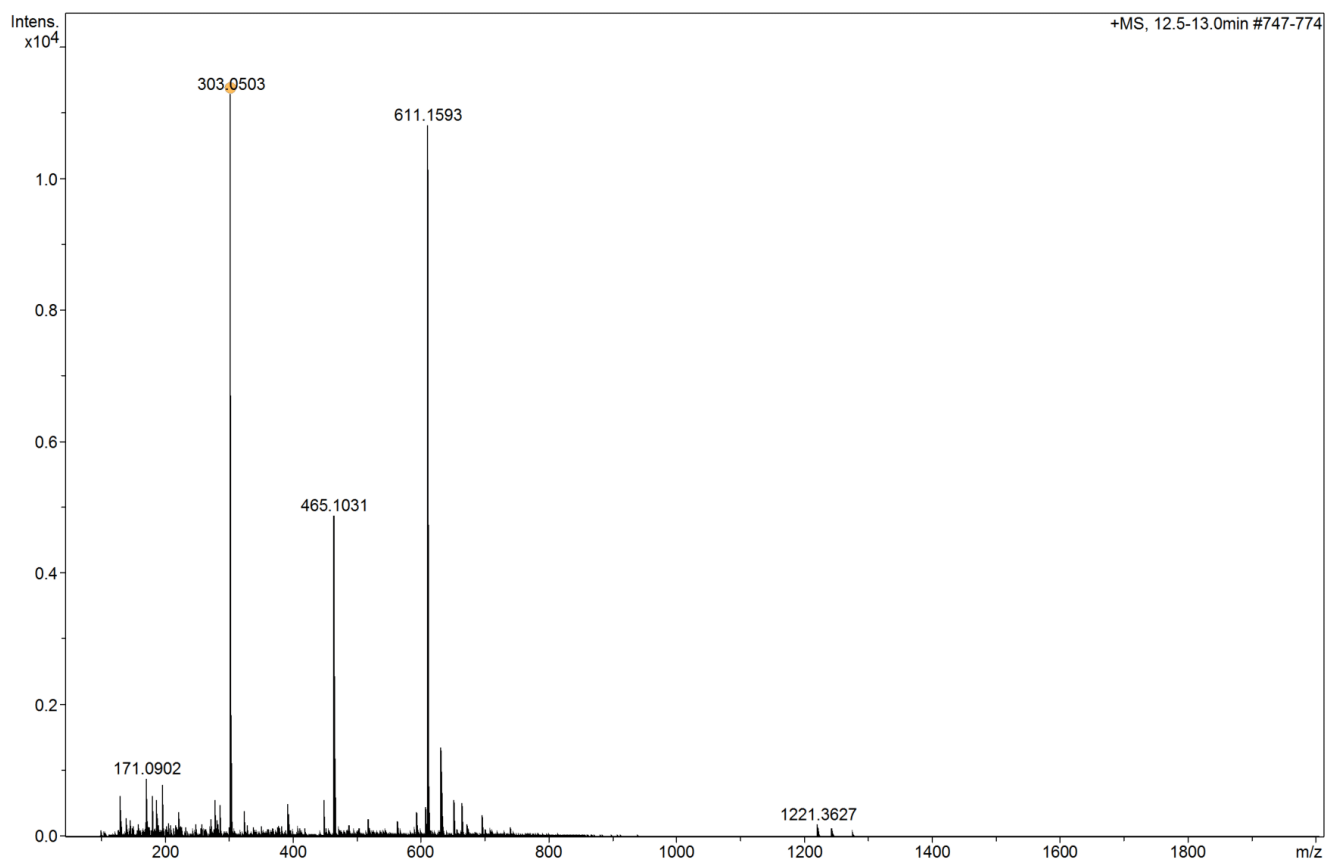

Bruker Compass DataAnalysis 4.3

printed: 19/2/2020 10:22:48 AM

by: Steven Yuan

Page 5 of 9

**Figure S7.** HR-ESIMS-QToF spectrum of compound **2** ( $t_R = 12.7$  min).

## Compound Spectrum SmartFormula Report

Cmpd 4, 13.1 min

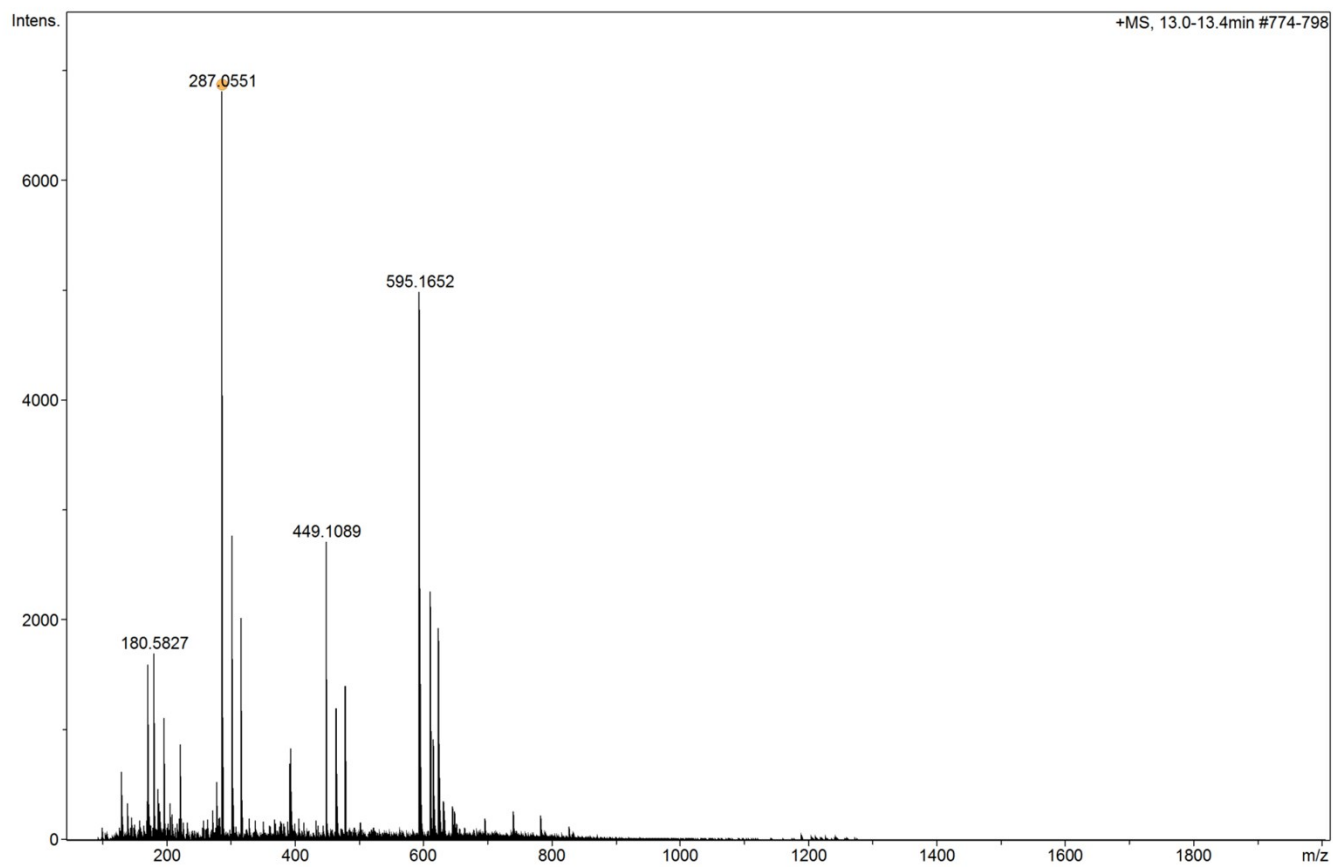

Bruker Compass DataAnalysis 4.3

printed: 19/2/2020 10:22:48 AM

by: Steven Yuan

Page 7 of 9

**Figure S8.** HR-ESIMS-QToF spectrum of compound **4** ( $t_R = 13.1$  min).

---

## Compound Spectrum SmartFormula Report

---

Cmpd 7, 11.6 min

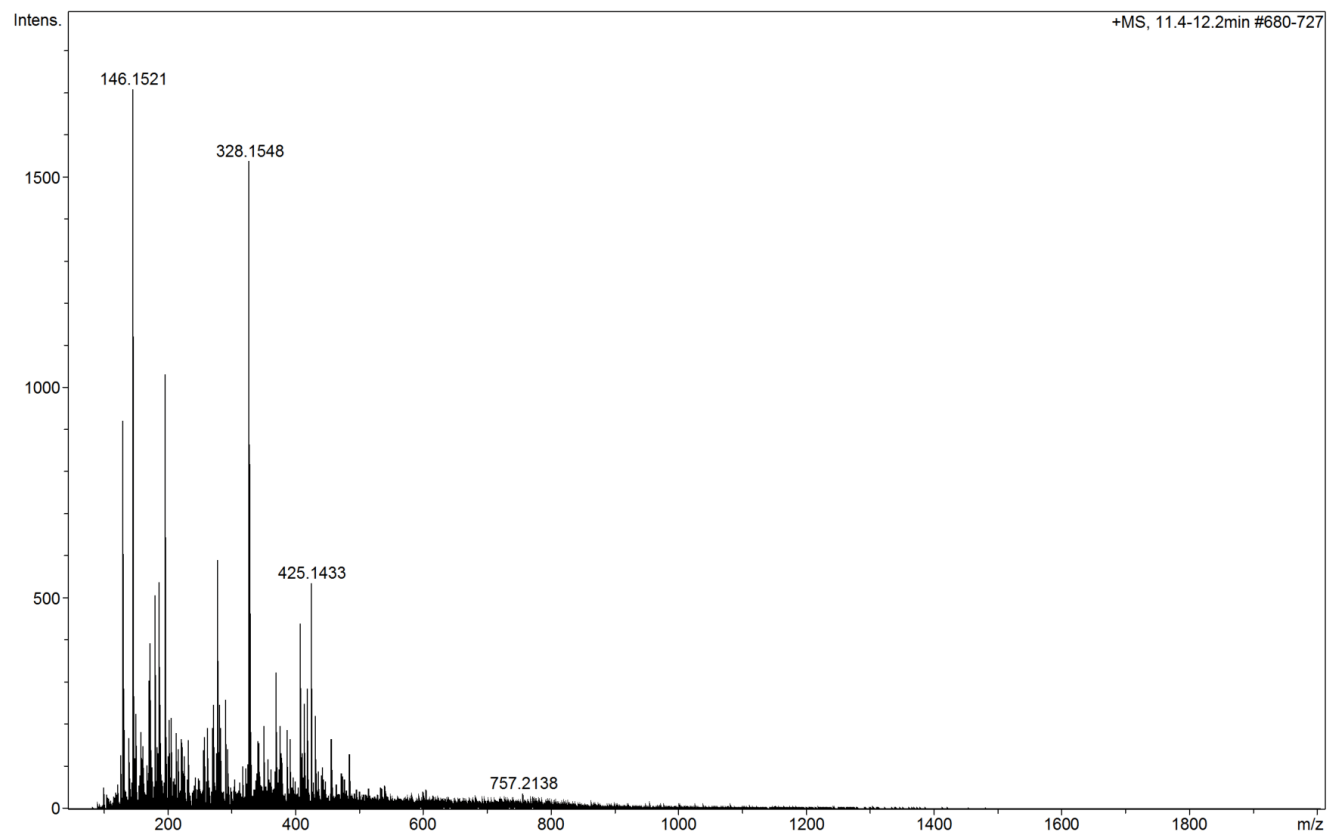

Bruker Compass DataAnalysis 4.3

printed: 19/2/2020 10:22:48 AM

by: Steven Yuan

Page 3 of 9

**Figure S9.** HR-ESIMS-QToF spectrum of compound **7** ( $t_R = 11.6$  min).

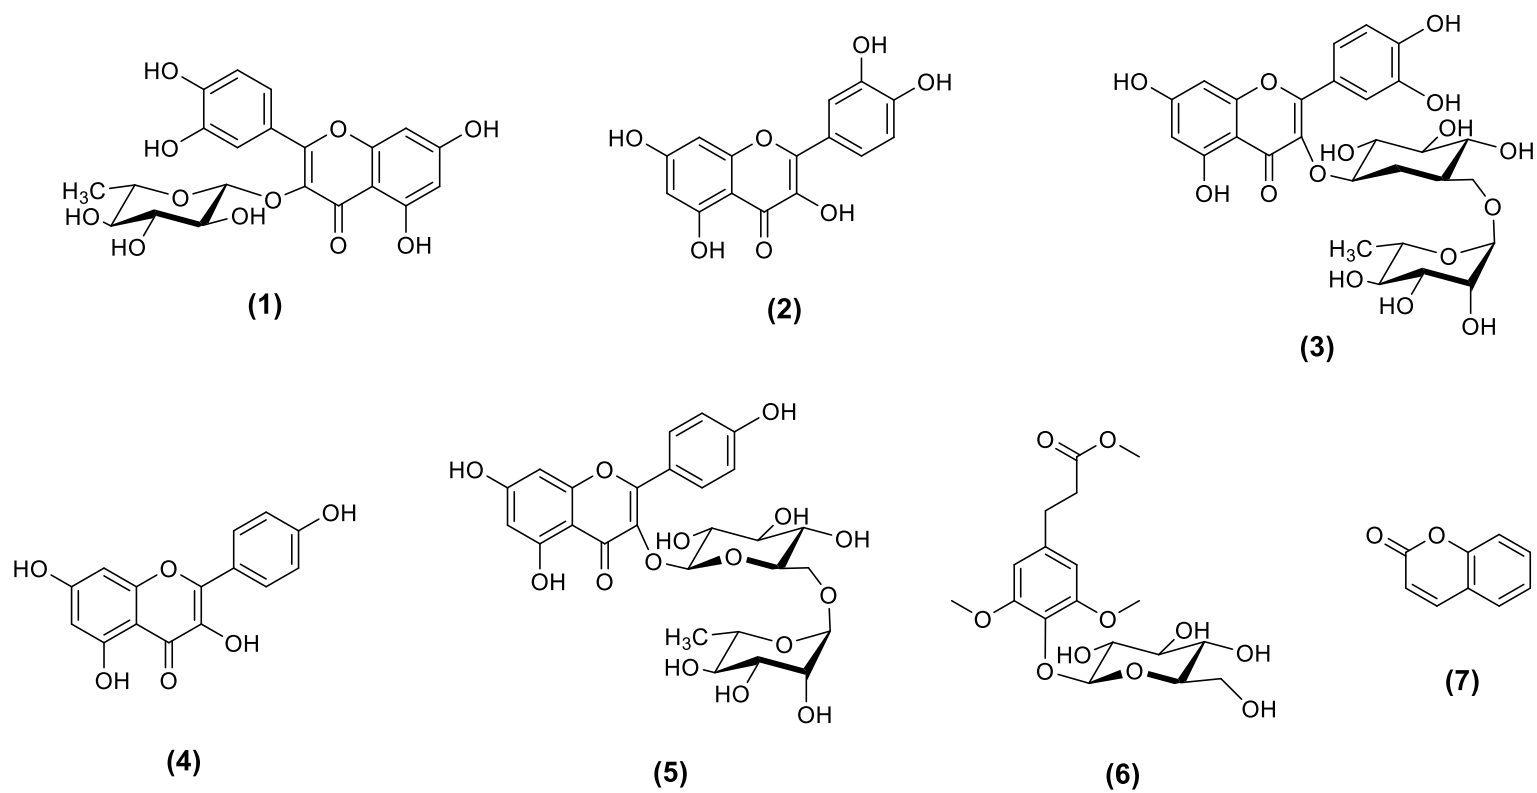

**Figure S10.** Secondary metabolites **1–7** detected in the n-butanol fraction of *U. alba*.

**Table S1.** Gene primer sequence.

| Gene          | Primer sequence                            | Annealing temperature |
|---------------|--------------------------------------------|-----------------------|
| iNOS          | Forward 5'-ATG TCC GAA GCA AAC ATCAC-3'    | 54°C                  |
|               | Reverse 5'-TAA TGT CCA GGA AGT AGG TG-3'   |                       |
| COX-2         | Forward 5'-CAG CAA ATC CTT GCT GTT CC-3'   | 54°C                  |
|               | Reverse 5'-TGG GCA AAG AAT GCA AAC ATC-3'  |                       |
| TNF- $\alpha$ | Forward 5'-TCT CAT CAG TTC TAT GGC CC-3'   | 57°C                  |
|               | Reverse 5'-GGG AGT AGA CAA GGT ACA AC-3'   |                       |
| IL-1 $\beta$  | Forward 5'-GGG CTG CTT CCA AAC CTT TG-3'   | 54°C                  |
|               | Reverse 5'-GCT TGG GAT CCA CAC TCT CC-3'   |                       |
| IL-6          | Forward 5'-AAG TGC ATC ATC GTT GTT TTCA-3' | 61°C                  |
|               | Reverse 5'-GAG GAT ACC ACT CCC AAC AG-3'   |                       |
| GAPDH         | Forward 5'-AGG CCG GTG CTG AGT ATG TC-3'   | 55°C                  |
|               | Reverse 5'-TGC CTG CTT CAC CAC CTT CT-3'   |                       |

**Table S2.** PCR reaction data.

|                                | Temperature | Time   |
|--------------------------------|-------------|--------|
| <b><i>One cycle</i></b>        |             |        |
| Reverse transcription reaction | 45°C        | 30 min |
| Denaturation of RNA            | 94°C        | 5 min  |
| <b><i>3-step cycle</i></b>     |             |        |
| Denaturation                   | 94°C        | 30 sec |
| Annealing                      | 54-61°C     | 30 sec |
| Extension                      | 72°C        | 1 min  |
| Repeat cycles 30 to 45         |             |        |
| <b><i>One cycle</i></b>        |             |        |
| Final extension                | 72°C        | 5 min  |

**Table S3.** Data of RNA quantification.

| Sample ID | User name | Date and Time         | Nucleic Acid Conc. | Unit  | A260   | A280   | 260/280 | 260/230 | Sample Type | Factor |
|-----------|-----------|-----------------------|--------------------|-------|--------|--------|---------|---------|-------------|--------|
|           | Choi      | 2021-08-19 오후 3:13:22 | 3139.0             | ng/μl | 78.475 | 39.447 | 1.99    | 1.82    | RNA         | 40.00  |
|           | Choi      | 2021-08-19 오후 3:13:54 | 1407.9             | ng/μl | 35.198 | 17.383 | 2.02    | 1.52    | RNA         | 40.00  |
|           | Choi      | 2021-08-19 오후 3:14:20 | 2213.0             | ng/μl | 55.325 | 28.303 | 1.95    | 1.12    | RNA         | 40.00  |
|           | Choi      | 2021-08-19 오후 3:14:46 | 2424.8             | ng/μl | 60.621 | 30.667 | 1.98    | 1.58    | RNA         | 40.00  |
|           | Choi      | 2021-08-19 오후 3:15:27 | 3150.6             | ng/μl | 78.765 | 39.459 | 2.00    | 1.82    | RNA         | 40.00  |
|           | Choi      | 2021-08-19 오후 3:15:51 | 1500.8             | ng/μl | 37.520 | 18.421 | 2.04    | 1.43    | RNA         | 40.00  |
|           | Choi      | 2021-08-19 오후 3:16:17 | 2207.7             | ng/μl | 55.191 | 28.294 | 1.95    | 1.08    | RNA         | 40.00  |
|           | Choi      | 2021-08-19 오후 3:16:39 | 2410.7             | ng/μl | 60.267 | 30.429 | 1.98    | 1.55    | RNA         | 40.00  |

| Sample ID | User name | Date and Time         | Nucleic Acid Conc. | Unit  | A260    | A280    | 260/280 | 260/230 | Sample Type | Factor |
|-----------|-----------|-----------------------|--------------------|-------|---------|---------|---------|---------|-------------|--------|
|           | Choi      | 2021-08-09 오후 2:25:41 | 9315.4             | ng/μl | 232.885 | 116.483 | 2.00    | 1.94    | RNA         | 40.00  |
|           | Choi      | 2021-08-09 오후 2:26:20 | 3416.5             | ng/μl | 85.412  | 42.802  | 2.00    | 1.89    | RNA         | 40.00  |
|           | Choi      | 2021-08-09 오후 2:26:59 | 2983.8             | ng/μl | 74.596  | 37.376  | 2.00    | 1.73    | RNA         | 40.00  |
|           | Choi      | 2021-08-09 오후 2:27:29 | 3245.8             | ng/μl | 81.146  | 40.618  | 2.00    | 1.93    | RNA         | 40.00  |
|           | Choi      | 2021-08-09 오후 2:28:31 | 9248.3             | ng/μl | 231.208 | 115.364 | 2.00    | 1.95    | RNA         | 40.00  |
|           | Choi      | 2021-08-09 오후 2:28:50 | 3403.0             | ng/μl | 85.074  | 42.594  | 2.00    | 1.88    | RNA         | 40.00  |
|           | Choi      | 2021-08-09 오후 2:29:10 | 2964.5             | ng/μl | 74.113  | 37.198  | 1.99    | 1.70    | RNA         | 40.00  |
|           | Choi      | 2021-08-09 오후 2:29:38 | 3226.5             | ng/μl | 80.662  | 40.346  | 2.00    | 1.91    | RNA         | 40.00  |

| Sample ID | User name | Date and Time         | Nucleic Acid Conc. | Unit  | A260   | A280   | 260/280 | 260/230 | Sample Type | Factor |
|-----------|-----------|-----------------------|--------------------|-------|--------|--------|---------|---------|-------------|--------|
|           | Choi      | 2021-09-13 오후 2:25:44 | 2488.8             | ng/μl | 62.221 | 31.366 | 1.98    | 2.12    | RNA         | 40.00  |
|           | Choi      | 2021-09-13 오후 2:26:26 | 2824.9             | ng/μl | 70.624 | 35.806 | 1.97    | 2.18    | RNA         | 40.00  |
|           | Choi      | 2021-09-13 오후 2:26:57 | 1918.4             | ng/μl | 47.961 | 24.229 | 1.98    | 2.12    | RNA         | 40.00  |
|           | Choi      | 2021-09-13 오후 2:27:27 | 1415.0             | ng/μl | 35.376 | 18.257 | 1.94    | 2.17    | RNA         | 40.00  |
|           | Choi      | 2021-09-13 오후 2:27:55 | 2435.0             | ng/μl | 60.875 | 30.681 | 1.98    | 2.12    | RNA         | 40.00  |
|           | Choi      | 2021-09-13 오후 2:28:20 | 2812.6             | ng/μl | 70.314 | 35.330 | 1.99    | 2.18    | RNA         | 40.00  |
|           | Choi      | 2021-09-13 오후 2:28:44 | 1915.4             | ng/μl | 47.884 | 24.107 | 1.99    | 2.10    | RNA         | 40.00  |
|           | Choi      | 2021-09-13 오후 2:29:11 | 1412.6             | ng/μl | 35.315 | 18.143 | 1.95    | 2.16    | RNA         | 40.00  |

**Table S4.** Secondary metabolites detected in the n-butanol fraction of *U. alba* (UaB).

| Cpd | Retention Time<br>( $t_R$ , min) | Molecular ion<br>( $m/z$ )     | Calculated<br>Mass | Molecular<br>Formula                            | Compound Identity                                                                                                                 | Reported Biological<br>Activity                                                                                                                      |
|-----|----------------------------------|--------------------------------|--------------------|-------------------------------------------------|-----------------------------------------------------------------------------------------------------------------------------------|------------------------------------------------------------------------------------------------------------------------------------------------------|
| 1   | 12.2                             | 449.2404<br>[M-H] <sup>-</sup> | 466.1111           | C <sub>21</sub> H <sub>20</sub> O <sub>11</sub> | Quercetin-3- <i>L</i> -<br>rhamnoside<br>(quercitrin)                                                                             | Anti-inflammatory <sup>2</sup>                                                                                                                       |
| 2   | 12.7                             | 303.0503<br>[M+H] <sup>+</sup> | 302.0427           | C <sub>15</sub> H <sub>10</sub> O <sub>7</sub>  | 5,7,3',4'-flavon-3-ol<br>(quercetin)                                                                                              | Anti-inflammatory(Tang<br>et al., 2019),<br>Antioxidative <sup>3,5</sup> , and<br>Antimicrobial <sup>4</sup>                                         |
| 3   | 12.7                             | 609.1471<br>[M-H] <sup>-</sup> | 610.5210           | C <sub>27</sub> H <sub>30</sub> O <sub>16</sub> | Quercetin 3-<br>rutinoside (rutin)                                                                                                | Antioxidative <sup>7,8</sup> , Anti-<br>inflammatory <sup>8,9</sup>                                                                                  |
| 4   | 13.1                             | 287.0551<br>[M+H] <sup>+</sup> | 286.2390           | C <sub>15</sub> H <sub>10</sub> O <sub>6</sub>  | Kaempferol                                                                                                                        | Anti-<br>inflammatory <sup>10,11,12</sup> , Antio-<br>xidative <sup>12,13</sup> ,<br>Antimicrobial <sup>12,13</sup> ,<br>Anticancer <sup>12,13</sup> |
| 5   | 13.1                             | 593.1522<br>[M-H] <sup>-</sup> | 594.5220           | C <sub>27</sub> H <sub>30</sub> O <sub>15</sub> | Kaempferol 3- <i>O</i> -<br>rutinoside                                                                                            | Anti-inflammatory <sup>14,15</sup>                                                                                                                   |
| 6   | 11.5                             | 401.1465<br>[M-H] <sup>-</sup> | 402.1526           | C <sub>18</sub> H <sub>26</sub> O <sub>10</sub> | methyl 3-(3,5-dime-<br>thoxy-4-((3,4,5-<br>trihydroxy-6-(hydroxy<br>methyl)tetrahydro-<br>2H-pyran-2-yl)oxy)<br>phenyl)propanoate | No reported activity                                                                                                                                 |
| 7   | 11.6                             | 146.1521<br>[M+H] <sup>+</sup> | 146.0368           | C <sub>9</sub> H <sub>6</sub> O <sub>2</sub>    | 1-benzopyran-2-one<br>(coumarin)                                                                                                  | Antihelminthic <sup>1</sup>                                                                                                                          |



**Table S5.** List of antibodies used in this study.

| <b>Antibody</b>    | <b>Supplier</b>                                  | <b>Product number</b> | <b>Dilution</b> |
|--------------------|--------------------------------------------------|-----------------------|-----------------|
| iNOS               | BD Biosciences (San Jose, CA, USA)               | 610328                | 1:1,000         |
| COX-2              | Cayman Chemical Company (Ann Arbor, MI, USA)     | 160126                | 1:500           |
| TNF- $\alpha$      | Santa Cruz Biotechnology, Inc. (Dallas, TX, USA) | sc-52746              | 1:1,000         |
| IL-6               | Santa Cruz Biotechnology, Inc.                   | sc-28343              | 1:1,000         |
| IL-1 $\beta$       | Santa Cruz Biotechnology, Inc.                   | sc-7884               | 1:1,000         |
| NF- $\kappa$ B p65 | Santa Cruz Biotechnology, Inc.                   | sc-8008               | 1:500           |
| I $\kappa$ B       | Cell Signaling Technology (Beverly, MA, USA)     | #9242                 | 1:500           |
| Laminin B          | Santa Cruz Biotechnology, Inc.                   | sc-374015             | 1:1,000         |
| Actin              | Santa Cruz Biotechnology, Inc.                   | sc-47778              | 1:1,000         |

## REFERENCES

- (1) von Son-de Fernex, E.; Alonso-Díaz, M. Á.; Valles-de la Mora, B.; Mendoza-de Gives, P.; González-Cortazar, M.; Zamilpa, A. Anthelmintic Effect of 2H-Chromen-2-One Isolated from *Gliricidia Sepium* against *Cooperia punctata*. *Exp. Parasitol.* **2017**, *178*, 1–6. <https://doi.org/10.1016/j.exppara.2017.04.013>.
- (2) Comalada, M.; Camuesco, D.; Sierra, S.; Ballester, I.; Xaus, J.; Gálvez, J.; Zarzuelo, A. In Vivo Quercitrin Anti-Inflammatory Effect Involves Release of Quercetin, Which Inhibits Inflammation through down-Regulation of the NF-KB Pathway. *Eur. J. Immunol.* **2005**, *35* (2), 584–592. <https://doi.org/10.1002/eji.200425778>.
- (3) Tang, J.; Diao, P.; Shu, X.; Li, L.; Xiong, L. Quercetin and Quercitrin Attenuates the Inflammatory Response and Oxidative Stress in LPS-Induced RAW264.7 Cells: In Vitro Assessment and a Theoretical Model. *BioMed Res. Int.* **2019**, *2019*. <https://doi.org/10.1155/2019/7039802>.
- (4) Xiong, G.; Ji, W.; Wang, F.; Zhang, F.; Xue, P.; Cheng, M.; Sun, Y.; Wang, X.; Zhang, T. Quercetin Inhibits Inflammatory Response Induced by Lps from *Porphyromonas Gingivalis* in Human Gingival Fibroblasts via Suppressing Nf-b Signaling Pathway. *BioMed Res. Int.* **2019**, *2019*. <https://doi.org/10.1155/2019/6282635>.
- (5) Ozdal, Z. D.; Sahmetlioglu, E.; Narin, I.; Cumaoglu, A. Synthesis of Gold and Silver Nanoparticles Using Flavonoid Quercetin and Their Effects on Lipopolysaccharide Induced Inflammatory Response in Microglial Cells. *3 Biotech*, **2019**, *9* (6). <https://doi.org/10.1007/s13205-019-1739-z>.
- (6) Anand David, A. V.; Arulmoli, R.; Parasuraman, S. Overviews of Biological Importance of Quercetin: A Bioactive Flavonoid. *Pharmacogn. Rev.* **2016**, *84–89*. <https://doi.org/10.4103/0973-7847.194044>.
- (7) Zhao, B.; Zhang, W.; Xiong, Y.; Zhang, Y.; Zhang, D.; Xu, X. Effects of Rutin on the Oxidative Stress, Proliferation and Osteogenic Differentiation of Periodontal Ligament Stem Cells in LPS-Induced Inflammatory Environment and the Underlying Mechanism. *J. Mol. Histol.* **2020**, *51* (2), 161–171. <https://doi.org/10.1007/s10735-020-09866-9>.
- (8) Nadella, V.; Ranjan, R.; Senthilkumaran, B.; Qadri, S. S. Y. H.; Pothani, S.; Singh, A. K.; Gupta, M. L.; Prakash, H. Podophyllotoxin and Rutin Modulate M1 (INOS+) Macrophages and Mitigate Lethal Radiation (LR) Induced Inflammatory Responses in Mice. *Front. Immunol.* **2019**. <https://doi.org/10.3389/fimmu.2019.00106>.
- (9) Gullón, B.; Lú-Chau, T. A.; Moreira, M. T.; Lema, J. M.; Eibes, G. Rutin: A Review on Extraction, Identification and Purification Methods, Biological Activities and Approaches to Enhance Its Bioavailability. *Trends Food Sci. Technol.* **2017**, *220–235*. <https://doi.org/10.1016/j.tifs.2017.07.008>.
- (10) Tang, X. L.; Liu, J. X.; Dong, W.; Li, P.; Li, L.; Hou, J. C.; Zheng, Y. Q.; Lin, C. R.; Ren, J. G. Protective Effect of Kaempferol on LPS plus ATP-Induced Inflammatory Response in Cardiac Fibroblasts. *Inflammation*, **2015**, *38* (1), 94–101. <https://doi.org/10.1007/s10753-014-0011-2>.
- (11) Zhu, L.; Wang, P.; Yuan, W.; Zhu, G. Kaempferol Inhibited Bovine Herpesvirus 1 Replication and LPS-Induced Inflammatory Response. *Acta Virol.* **2018**, *62* (2), 220–225. [https://doi.org/10.4149/av\\_2018\\_206](https://doi.org/10.4149/av_2018_206).
- (12) Shields, M. Chemotherapeutics. In *Pharmacognosy: Fundamentals, Applications and Strategy*, **2017**, 295–313. <https://doi.org/10.1016/B978-0-12-802104-0.00014-7>.
- (13) Saldanha, E.; Saxena, A.; Kaur, K.; Kalekhan, F.; Venkatesh, P.; Fayad, R.; Rao, S.; George, T.; Baliga, M. S. Polyphenols in the Prevention of Ulcerative Colitis: A Revisit. A Revisit. In *Dietary Interventions in Gastrointestinal Diseases: Foods, Nutrients, and Dietary Supplements*, **2019**, 277–287. <https://doi.org/10.1016/B978-0-12-814468-8.00023-5>.

(14) Hua, F.; Zhou, P.; Liu, P. pei; Bao, G. H. Rat Plasma Protein Binding of Kaempferol-3-O-Rutinoside from Lu'an GuaPian Tea and Its Anti-Inflammatory Mechanism for Cardiovascular Protection. *J. Food Biochem.* **2021**, *45* (7). <https://doi.org/10.1111/jfbc.13749>.

(15) Hwang, D.; Kang, M. J.; Kang, C. W.; Kim, G. Do. Kaempferol-3-O- $\beta$ -Rutinoside Suppresses the Inflammatory Responses in Lipopolysaccharide-Stimulated RAW264.7 Cells via the NF-KB and MAPK Pathways. *Int. J. Mol. Med.* **2019**, *44* (6), 2321–2328. <https://doi.org/10.3892/ijmm.2019.4381>.
